# Supplementary figures and images for: A stomatin dimer modulates the activity of acid-sensing ion channels
Source: PubMed Central journal article supplement — EMBO J. 2012 Jul 31;31(17):3635–46. doi: 10.1038/emboj.2012.203 (PMC3433786; doi:10.1038/emboj.2012.203), 2012-07-31

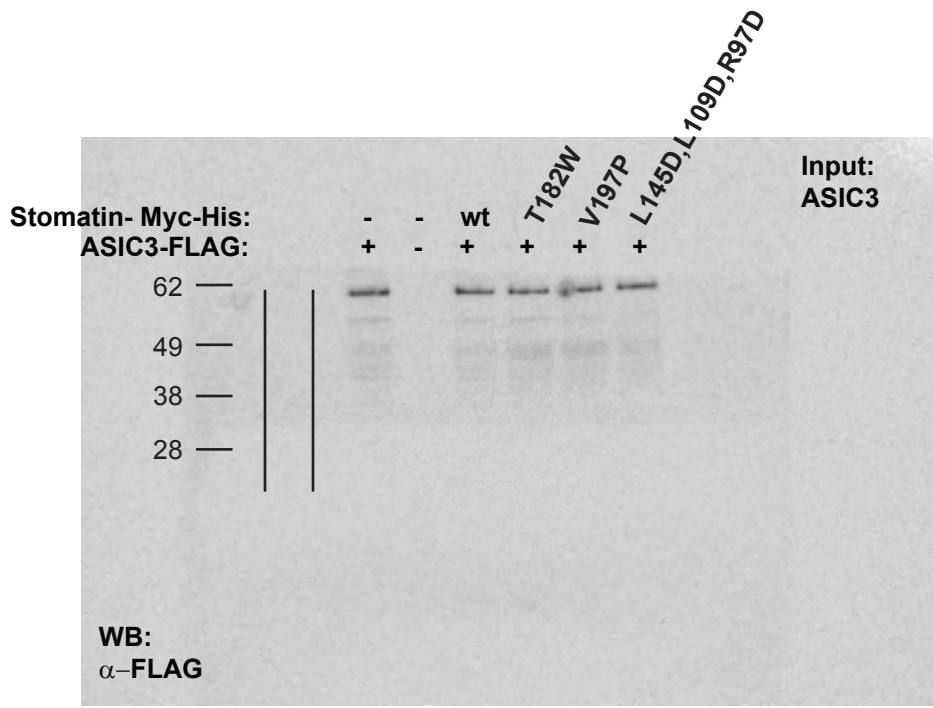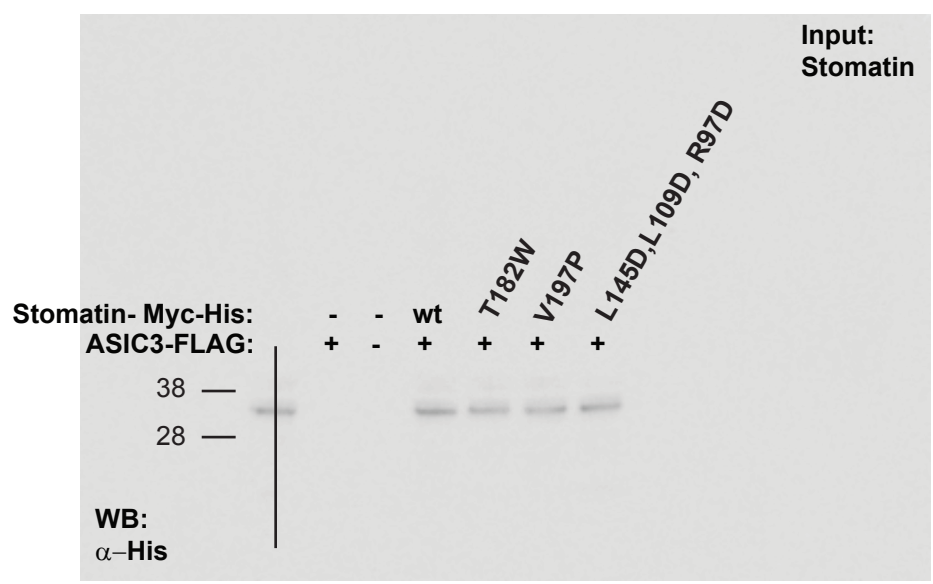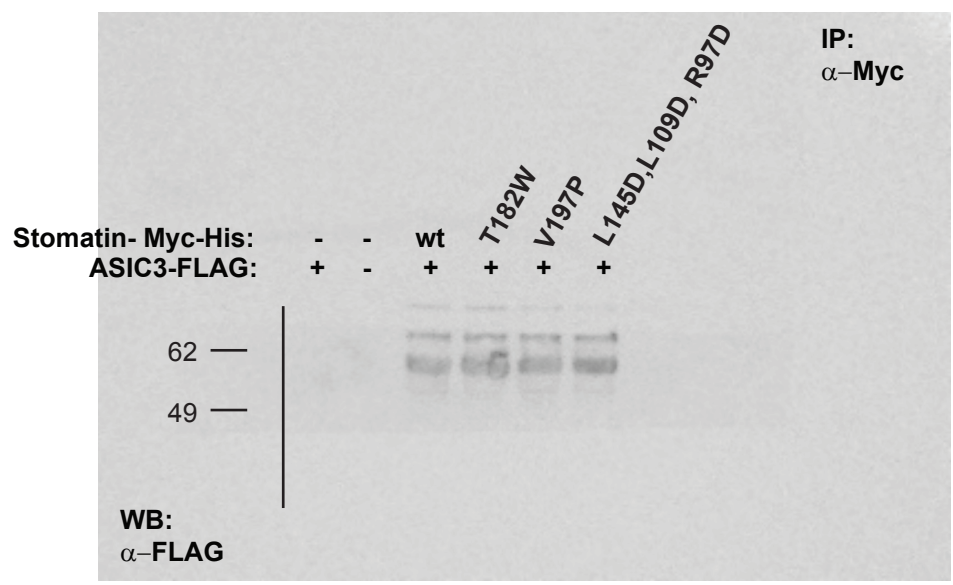

Supplement: emboj2012203s2.pdf [file emboj2012203s2.pdf]

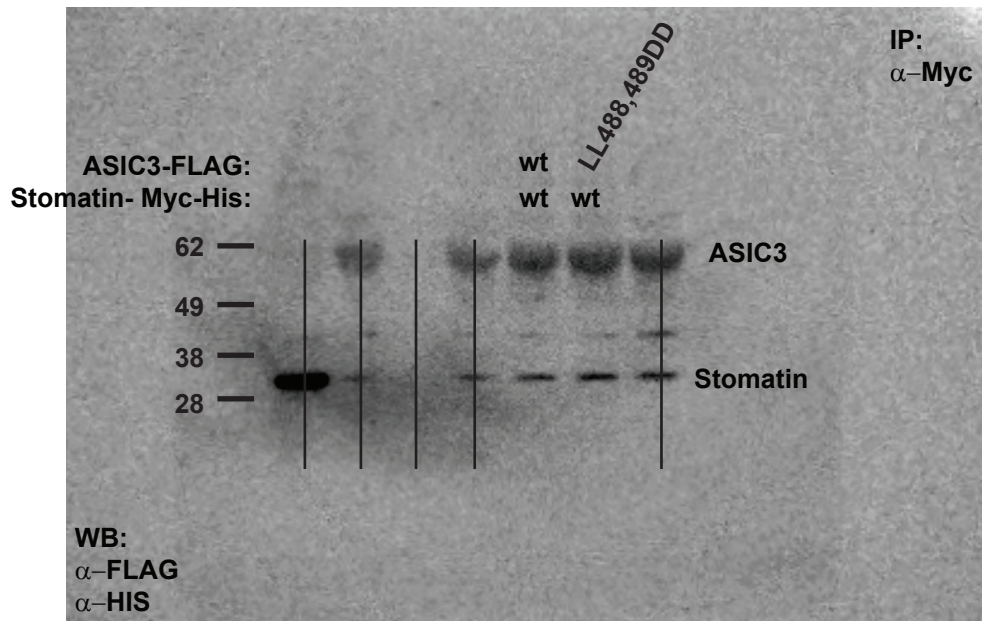

Supplement: emboj2012203s3.pdf [file emboj2012203s3.pdf]
